# Supplementary material
Source: MDPI journal article supplement (https://www.mdpi.com/2077-0472/13/10/1998)
Supplement: s1 [file s1]

Table S1. Incubation days of the grape plates under the different conditions tested.

| Conditions |                  | Incubation days |
|------------|------------------|-----------------|
| $a_w$      | Temperature (°C) |                 |
| 0.99       | 28               | 7               |
| 0.96       |                  | 7               |
| 0.93       |                  | 8               |
| 0.90       |                  | 15              |
| 0.85       |                  | 15              |
| 0.99       | 32               | 5               |
| 0.96       |                  | 5               |
| 0.93       |                  | 7               |
| 0.90       |                  | 15              |
| 0.85       |                  | 15              |
| 0.99       | 37               | 8               |
| 0.96       |                  | 7               |
| 0.93       |                  | 8               |
| 0.90       |                  | 15              |
| 0.85       |                  | 15              |
| 0.99       | 42               | 15              |
| 0.96       |                  | 15              |
| 0.93       |                  | 15              |
| 0.90       |                  | 15              |
| 0.85       |                  | 15              |
